# Supplementary material for: Design and Synthesis of a Novel PLK1 Inhibitor Scaffold Using a Hybridized 3D-QSAR Model
Source: MDPI journal article supplement (doi:10.3390/ijms22083865), 2021-04-08

## Supplementary Materials

# Design and synthesis of a novel PLK1 inhibitor scaffold *via* hybridized 3D-QSAR model

Youri Oht, Hoyong Jung†, Hyejin Kim, Jihyun Baek, Joonhong Jun, Hyunwook Cho, Daseul Im and Jung-Mi Hah\*

Department of Pharmacy, College of Pharmacy, Hanyang University 55 Hanyangdaehak-ro, Sangnok-gu, Ansan Kyeonggi-do, 426-791, Republic of Korea

### S1. The structures of the chemically named compounds in QSAR studies

#### 1) Thiophene-2-carboxamide derivatives

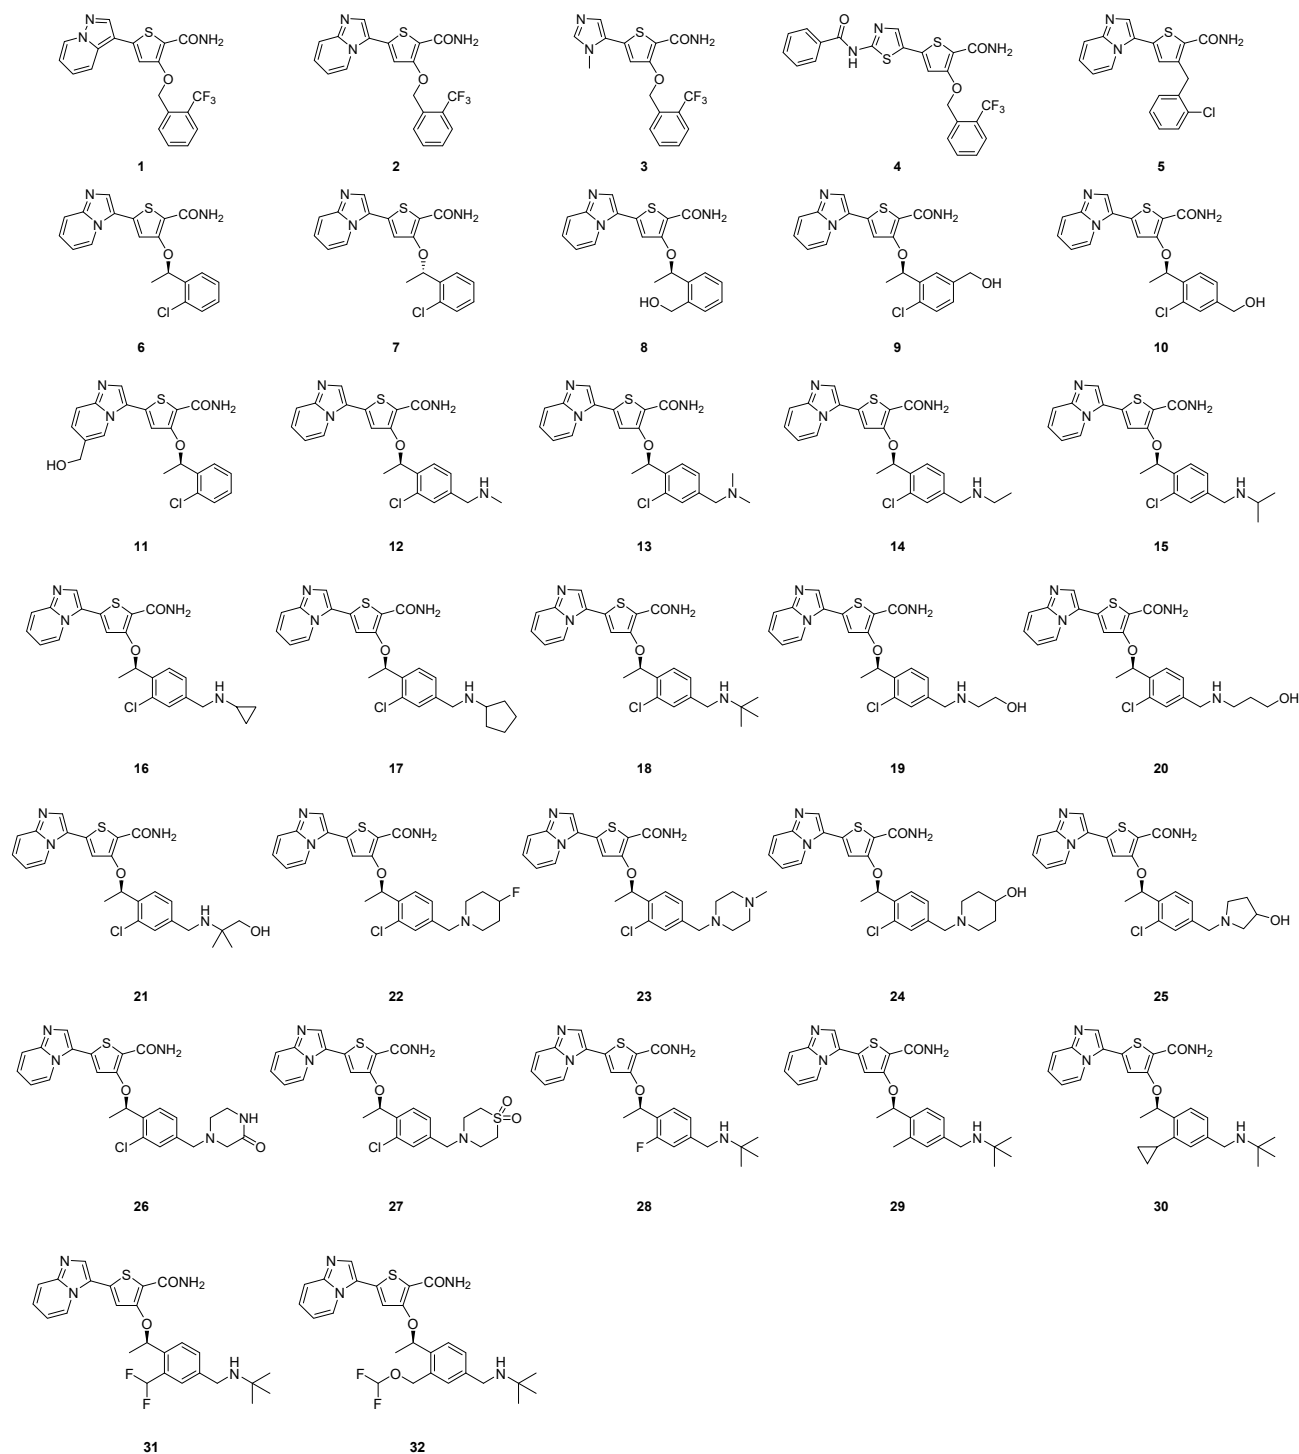

## 2) 8-Amino-4,5-dihydro-1H-pyrazolo[4,3-h]quinazoline-3-carboxamide derivatives

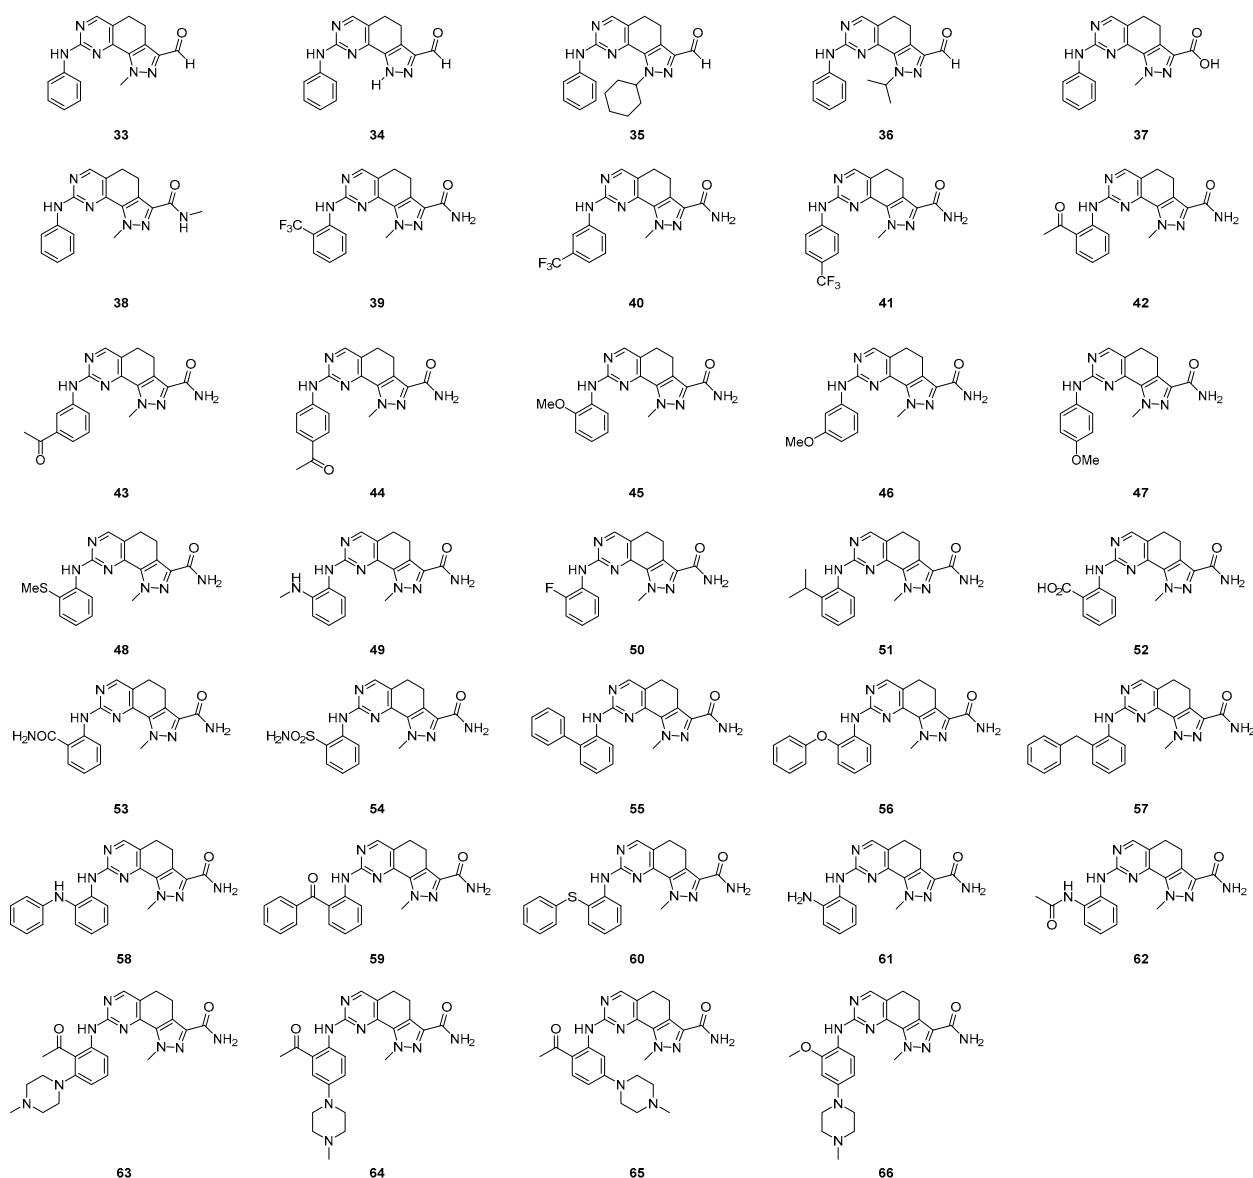

### Alignments for CoMFA and CoMSIA

We obtained 36 thiophene-2-carboxamide derivatives and 44 8-amino-4,5-dihydro-1H-pyrazolo[4,3-h]quinazoline-3-carboxamide derivatives from the literature, and two representative compounds **18** and **49** were selected for standard compounds in each series. We excluded 12 compounds due to low activity ( $IC_{50} > 3 \mu M$ ) and 5 that were racemates and outliers of the QSAR model. Finally, we sorted 66 compounds for the QSAR model. We used  $pIC_{50}$  values as the dependent variable in the QSAR model. The 66 compounds were split into a training set of 54 compounds to create a QSAR model and a test set of 12 compounds to validate the model. We used 1:6 ratio to divide the dataset compounds and also mention number of compounds selected in the test set based on the structure and activity ( $pIC_{50}$ ). This is also supported by saying that the test set compounds are selected in a way that they comprise compounds having high, moderate and low activity values. We used one of the algorithms given in the article to divide the dataset compounds into training and test sets, using Algorithm 4 (activity ranking). (*Journal of Computer-Aided Molecular Design*, 16: 357–369, 2002)

**Table S1.** The structures of thiophene-2-carboxamide derivatives and their activities on Plk1.

| No. | Substituents                                         |                                                                                        | Activity (nM)    |                   |
|-----|------------------------------------------------------|----------------------------------------------------------------------------------------|------------------|-------------------|
|     | R <sup>1</sup>                                       | R <sup>2</sup>                                                                         | IC <sub>50</sub> | pIC <sub>50</sub> |
| 1   | pyrazolo[1,5- <i>a</i> ]pyridin-3-yl                 | (2-(trifluoromethyl)benzyl)oxy                                                         | 130              | 6.8861            |
| 2   | imidazo[1,2- <i>a</i> ]pyridin-3-yl                  | (2-(trifluoromethyl)benzyl)oxy                                                         | 22               | 7.6576            |
| 3   | 1-methyl-1 <i>H</i> -imidazol-5-yl                   | (2-(trifluoromethyl)benzyl)oxy                                                         | 430              | 6.3665            |
| 4   | 2-benzamidothiazol-5-yl                              | (2-(trifluoromethyl)benzyl)oxy                                                         | 2100             | 5.6778            |
| 5   | imidazo[1,2- <i>a</i> ]pyridin-3-yl                  | 2-chlorobenzyl                                                                         | 35               | 7.4559            |
| 6   | imidazo[1,2- <i>a</i> ]pyridin-3-yl                  | ( <i>R</i> )-1-(2-chlorophenyl)ethoxy                                                  | 7                | 8.1549            |
| 7   | imidazo[1,2- <i>a</i> ]pyridin-3-yl                  | ( <i>S</i> )-1-(2-chlorophenyl)ethoxy                                                  | 300              | 6.5229            |
| 8   | imidazo[1,2- <i>a</i> ]pyridin-3-yl                  | ( <i>R</i> )-1-(2-(hydroxymethyl)phenyl)ethoxy                                         | 88               | 7.0555            |
| 9   | imidazo[1,2- <i>a</i> ]pyridin-3-yl                  | ( <i>R</i> )-1-(2-chloro-5-(hydroxymethyl)phenyl)ethoxy                                | 39               | 7.4089            |
| 10  | imidazo[1,2- <i>a</i> ]pyridin-3-yl                  | ( <i>R</i> )-1-(2-chloro-4-(hydroxymethyl)phenyl)ethoxy                                | 4.9              | 8.3098            |
| 11  | 6-(hydroxymethyl)imidazo[1,2- <i>a</i> ]pyridin-3-yl | ( <i>R</i> )-1-(2-chlorophenyl)ethoxy                                                  | 7.3              | 8.1367            |
| 12  | imidazo[1,2- <i>a</i> ]pyridin-3-yl                  | ( <i>R</i> )-1-(2-chloro-4-((methylamino)methyl)phenyl)ethoxy                          | 16               | 7.7959            |
| 13  | imidazo[1,2- <i>a</i> ]pyridin-3-yl                  | ( <i>R</i> )-1-(2-chloro-4-((dimethylamino)methyl)phenyl)ethoxy                        | 22               | 7.6576            |
| 14  | imidazo[1,2- <i>a</i> ]pyridin-3-yl                  | ( <i>R</i> )-1-(2-chloro-4-((ethylamino)methyl)phenyl)ethoxy                           | 21               | 7.6778            |
| 15  | imidazo[1,2- <i>a</i> ]pyridin-3-yl                  | ( <i>R</i> )-2-chloro-4-((isopropylamino)methyl)phenyl)ethoxy                          | 28               | 7.5528            |
| 16  | imidazo[1,2- <i>a</i> ]pyridin-3-yl                  | ( <i>R</i> )-2-chloro-4-((cyclopropylamino)methyl)phenyl)ethoxy                        | 12               | 7.9208            |
| 17  | imidazo[1,2- <i>a</i> ]pyridin-3-yl                  | ( <i>R</i> )-2-chloro-4-((cyclopentylamino)methyl)phenyl)ethoxy                        | 25               | 7.6021            |
| 18  | imidazo[1,2- <i>a</i> ]pyridin-3-yl                  | ( <i>R</i> )-1-(4-((tert-butylamino)methyl)-2-chlorophenyl)ethoxy                      | 21               | 7.6778            |
| 19  | imidazo[1,2- <i>a</i> ]pyridin-3-yl                  | ( <i>R</i> )-1-(2-chloro-4-((2-hydroxyethyl)amino)methyl)phenyl)ethoxy                 | 21               | 7.6778            |
| 20  | imidazo[1,2- <i>a</i> ]pyridin-3-yl                  | ( <i>R</i> )-1-(2-chloro-4-((3-hydroxypropyl)amino)methyl)phenyl)ethoxy                | 19               | 7.7212            |
| 21  | imidazo[1,2- <i>a</i> ]pyridin-3-yl                  | ( <i>R</i> )-1-(2-chloro-4-(((1-hydroxy-2-methylpropan-2-yl)amino)methyl)phenyl)ethoxy | 23               | 7.6383            |
| 22  | imidazo[1,2- <i>a</i> ]pyridin-3-yl                  | ( <i>R</i> )-1-(2-chloro-4-((4-fluoropiperidin-1-yl)methyl)phenyl)ethoxy               | 13               | 7.8861            |
| 23  | imidazo[1,2- <i>a</i> ]pyridin-3-yl                  | ( <i>R</i> )-1-(2-chloro-4-((4-methylpiperazin-1-yl)methyl)phenyl)ethoxy               | 17               | 7.7696            |
| 24  | imidazo[1,2- <i>a</i> ]pyridin-3-yl                  | ( <i>R</i> )-1-(2-chloro-4-((4-hydroxypiperidin-1-yl)methyl)phenyl)ethoxy              | 27               | 7.5686            |
| 25  | imidazo[1,2- <i>a</i> ]pyridin-3-yl                  | ( <i>R</i> )-1-(2-chloro-4-((3-hydroxypyrrolidin-1-yl)methyl)phenyl)ethoxy             | 20               | 7.6990            |
| 26  | imidazo[1,2- <i>a</i> ]pyridin-3-yl                  | ( <i>R</i> )-1-(2-chloro-4-((3-oxopiperazin-1-yl)methyl)phenyl)ethoxy                  | 12               | 7.9208            |
| 27  | imidazo[1,2- <i>a</i> ]pyridin-3-yl                  | ( <i>R</i> )-1-(2-chloro-4-((1,1-dioxidothiomorpholino)methyl)phenyl)ethoxy            | 16               | 7.7959            |

|    |                                     |                                                                                      |     |        |
|----|-------------------------------------|--------------------------------------------------------------------------------------|-----|--------|
| 28 | imidazo[1,2- <i>a</i> ]pyridin-3-yl | ( <i>R</i> )-1-(4-((tert-butylamino)methyl)-2-fluorophenyl)ethoxy                    | 46  | 7.3372 |
| 29 | imidazo[1,2- <i>a</i> ]pyridin-3-yl | ( <i>R</i> )-1-(4-((tert-butylamino)methyl)-2-methylphenyl)ethoxy                    | 150 | 6.8239 |
| 30 | imidazo[1,2- <i>a</i> ]pyridin-3-yl | ( <i>R</i> )-1-(4-((tert-butylamino)methyl)-2-cyclopropylphenyl)ethoxy               | 210 | 6.6778 |
| 31 | imidazo[1,2- <i>a</i> ]pyridin-3-yl | ( <i>R</i> )-1-(4-((tert-butylamino)methyl)-2-(difluoromethyl)phenyl)ethoxy          | 20  | 7.6990 |
| 32 | imidazo[1,2- <i>a</i> ]pyridin-3-yl | ( <i>R</i> )-1-(4-((tert-butylamino)methyl)-2-((difluoromethoxy)methyl)phenyl)ethoxy | 9.8 | 8.0088 |

**Table S2.** The structures of 8-amino-4, 5-dihydro-1*H*-pyrazolo[4,3-*h*]quinazoline-3-carbaldehyde derivatives and their activities in Plk1

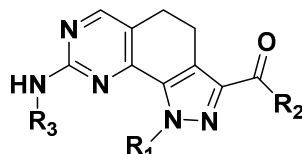

| No. | Substituents   |                 |                                            | Activity (nM)    |                   |
|-----|----------------|-----------------|--------------------------------------------|------------------|-------------------|
|     | R <sup>1</sup> | R <sup>2</sup>  | R <sup>3</sup>                             | IC <sub>50</sub> | pIC <sub>50</sub> |
| 33  | Me             | H               | phenyl                                     | 68               | 7.1675            |
| 34  | H              | H               | phenyl                                     | 248              | 6.6055            |
| 35  | cyclohexyl     | H               | phenyl                                     | 143              | 6.8447            |
| 36  | <i>i</i> Pro   | H               | phenyl                                     | 430              | 6.3665            |
| 37  | Me             | OH              | Phenyl                                     | 110              | 6.9586            |
| 38  | Me             | NHMe            | Phenyl                                     | 4215             | 5.3752            |
| 39  | Me             | NH <sub>2</sub> | 2-trifluoromethylphenyl                    | 432              | 6.3645            |
| 40  | Me             | NH <sub>2</sub> | 3-trifluoromethylphenyl                    | 51               | 7.2924            |
| 41  | Me             | NH <sub>2</sub> | 4-trifluoromethylphenyl                    | 872              | 6.0695            |
| 42  | Me             | NH <sub>2</sub> | 2-acetylphenyl                             | 346              | 6.4609            |
| 43  | Me             | NH <sub>2</sub> | 3-acetylphenyl                             | 100              | 7.0000            |
| 44  | Me             | NH <sub>2</sub> | 4-acetylphenyl                             | 197              | 6.7055            |
| 45  | Me             | NH <sub>2</sub> | 2-methoxyphenyl                            | 42               | 7.3768            |
| 46  | Me             | NH <sub>2</sub> | 3-methoxyphenyl                            | 135              | 6.8697            |
| 47  | Me             | NH <sub>2</sub> | 4-methoxyphenyl                            | 256              | 6.5918            |
| 48  | Me             | NH <sub>2</sub> | 2-methylthiophenyl                         | 97               | 6.3116            |
| 49  | Me             | NH <sub>2</sub> | 2-(methylamino)phenyl                      | 110              | 6.9586            |
| 50  | Me             | NH <sub>2</sub> | 2-fluorophenyl                             | 125              | 6.9031            |
| 51  | Me             | NH <sub>2</sub> | 2-isopropylphenyl                          | 365              | 6.4377            |
| 52  | Me             | NH <sub>2</sub> | 2-(methylcarboxy)phenyl                    | 1117             | 5.9519            |
| 53  | Me             | NH <sub>2</sub> | 2-carbamoylphenyl                          | 2076             | 5.6828            |
| 54  | Me             | NH <sub>2</sub> | 2-sulfamoylphenyl                          | 3733             | 5.4279            |
| 55  | Me             | NH <sub>2</sub> | [1,1'-biphenyl]-2-yl                       | 1565             | 5.8055            |
| 56  | Me             | NH <sub>2</sub> | 2-phenoxyphenyl                            | 278              | 6.5560            |
| 57  | Me             | NH <sub>2</sub> | 2-benzylphenyl                             | 943              | 6.0255            |
| 58  | Me             | NH <sub>2</sub> | 2-(phenylamino)phenyl                      | 949              | 6.0227            |
| 59  | Me             | NH <sub>2</sub> | 2-benzoylphenyl                            | 1969             | 5.7058            |
| 60  | Me             | NH <sub>2</sub> | 2-(phenylthio)phenyl                       | 2033             | 5.6919            |
| 61  | Me             | NH <sub>2</sub> | 2-aminophenyl                              | 150              | 6.8239            |
| 62  | Me             | NH <sub>2</sub> | 2-acetamidophenyl                          | 2523             | 5.5981            |
| 63  | Me             | NH <sub>2</sub> | 2-acetyl-3-(4-methylpiperazin-1-yl)phenyl  | 2051             | 5.6880            |
| 64  | Me             | NH <sub>2</sub> | 2-acetyl-4-(4-methylpiperazin-1-yl)phenyl  | 464              | 6.3335            |
| 65  | Me             | NH <sub>2</sub> | 2-acetyl-5-(4-methylpiperazin-1-yl)phenyl  | 109              | 6.9626            |
| 66  | Me             | NH <sub>2</sub> | 2-methoxy-4-(4-methylpiperazin-1-yl)phenyl | 40               | 7.3979            |

## S2. Syntheses of 4-bromomethyl-3-chlorobenzoyloxy (*t*-butyl)dimethylsilane

**Scheme S1.** Synthesis of 4-bromomethyl-3-chlorobenzoyloxy (*t*-butyl)dimethylsilane.

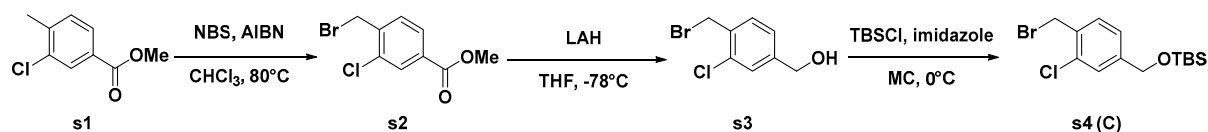

### 4-(Bromomethyl)-3-chlorobenzoate (s2)

Methyl 4-(bromomethyl)-3-chlorobenzoate (s1, 0.542 mmol) was dissolved in 2.71 ml of CHCl<sub>3</sub>, AIBN (0.0542 mmol) and NBS (0.813 mmol) were sequentially added, followed by stirring at 80 °C for 20 hours. The reaction mixture was cooled to room temperature and concentrated *in vacuo*, followed by column chromatography and purification under EA : Hex (1:100) conditions to obtain methyl 4-(bromomethyl)-3-chlorobenzoate (s2; 70%). <sup>1</sup>H NMR (400 MHz, DMSO) δ 7.97 (d, *J* = 1.7 Hz, 1H), 7.90 (d, *J* = 1.7 Hz, 1H), 7.78 (d, *J* = 8.0 Hz, 1H), 4.79 (s, 2H), 3.87 (s, 3H).

### 4-(Bromomethyl)-3-chlorophenylmethanol (s3)

Compound s2 (0.372 mmol) was dissolved in 3.72 ml of THF, and Lithium aluminum hydride (0.223 mmol) was dropwise at -78 °C, followed by stirring for 1 hour. After completion of the reaction, work up was performed with ethyl acetate and 1N HCl solution. The organic layer was dried with anhydrous sodium sulfate (Na<sub>2</sub>SO<sub>4</sub>), and the solvent was evaporated, followed by column chromatography and purification under EA:Hex (1:5) conditions to obtain compound s3 (31%); <sup>1</sup>H NMR (400 MHz, DMSO) δ 7.56 (d, *J* = 7.8 Hz, 1H), 7.42 (s, 1H), 7.29 – 7.25 (m, 1H), 5.35 (t, *J* = 5.8 Hz, 1H), 4.73 (s, 2H), 4.50 (d, *J* = 5.8 Hz, 2H).

### ((4-(bromomethyl)-3-chlorobenzyl)oxy)(tert-butyl)dimethylsilane (s4)

Compound s3 (0.317 mmol) was dissolved in 1.59 ml of MC, TBSCl (0.476 mmol) and imidazole (0.634 mmol) were added, followed by stirring for 1 hour. After completion of the reaction, work up was performed with MC and H<sub>2</sub>O. The organic layer was dried with anhydrous sodium sulfate (Na<sub>2</sub>SO<sub>4</sub>) and the solvent was evaporated to give compound s4 (99%); <sup>1</sup>H NMR (400 MHz, DMSO) δ 7.58 (dd, *J* = 7.9, 2.1 Hz, 1H), 7.40 (d, *J* = 6.7 Hz, 1H), 7.29 (d, *J* = 7.0 Hz, 1H), 4.81 (s, 2H), 4.72 (s, 2H), 0.90 (s, 9H), 0.08 (s, 6H).

## S3. Dose-response curve for IC<sub>50</sub> evaluation of compound 15 (Reaction Biology Corp. Kinase Hot Spot<sup>SM</sup> service)

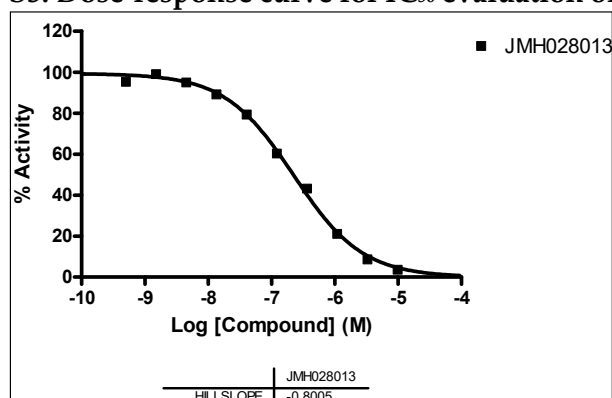

## S4. Representative $^1\text{H}$ NMR spectrum

13a

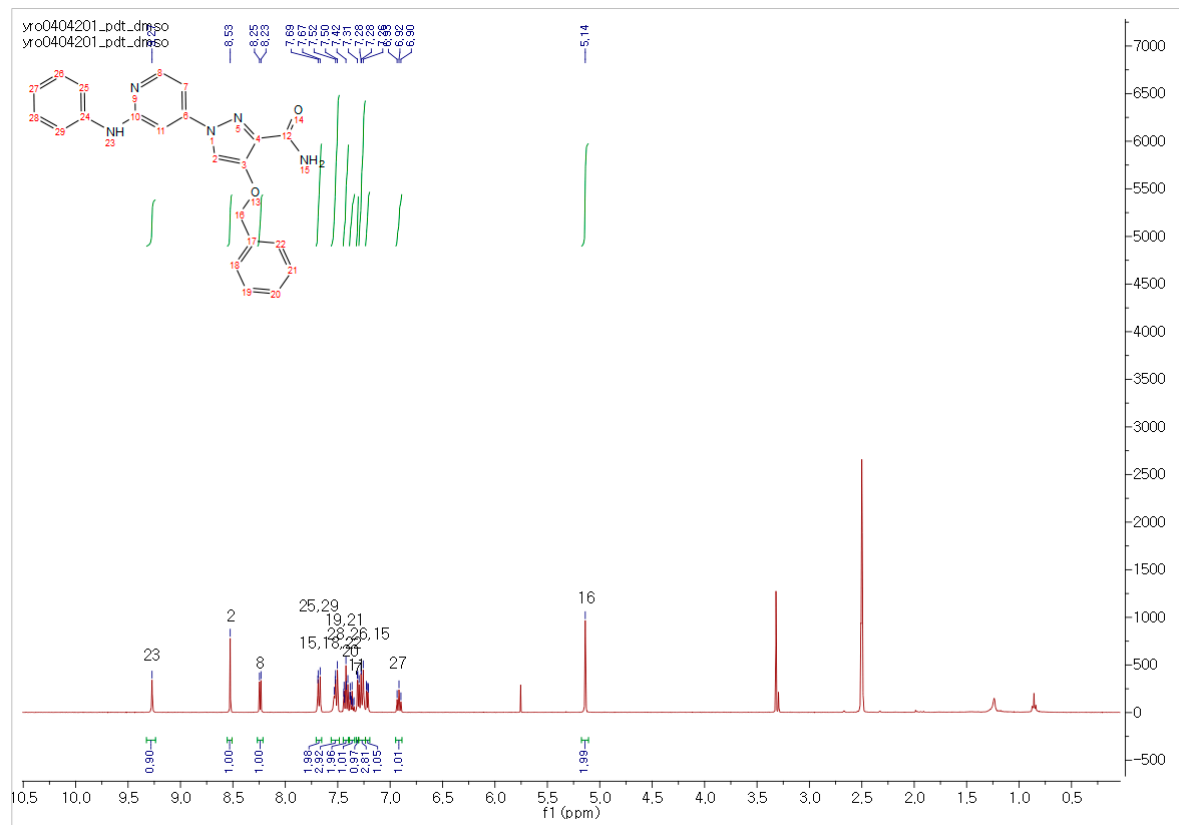

14a

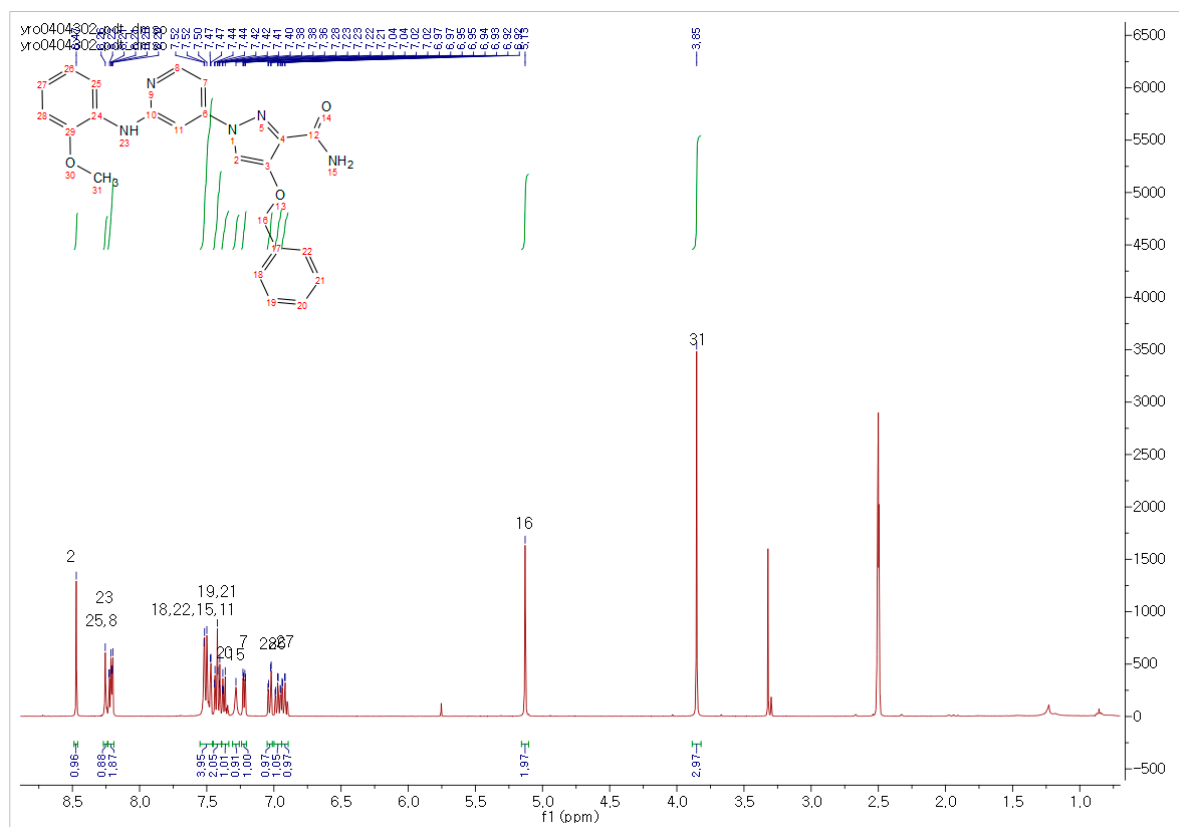

15

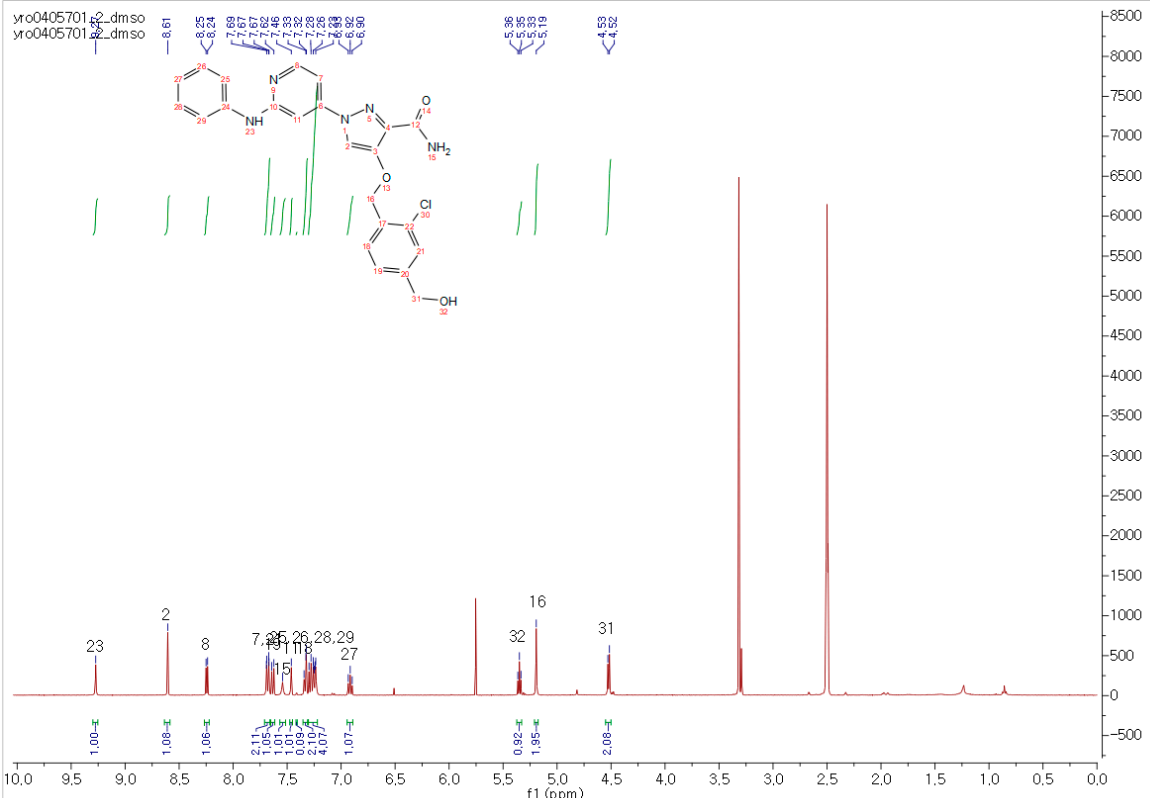

16

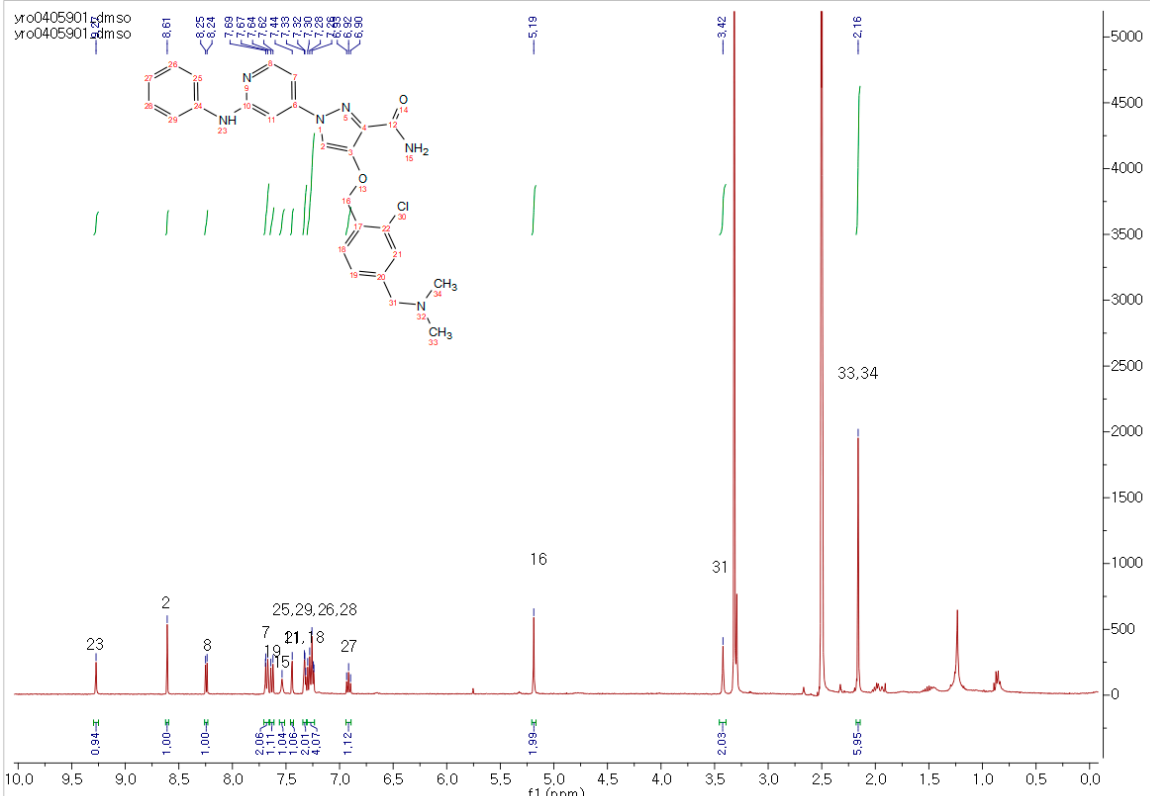

17

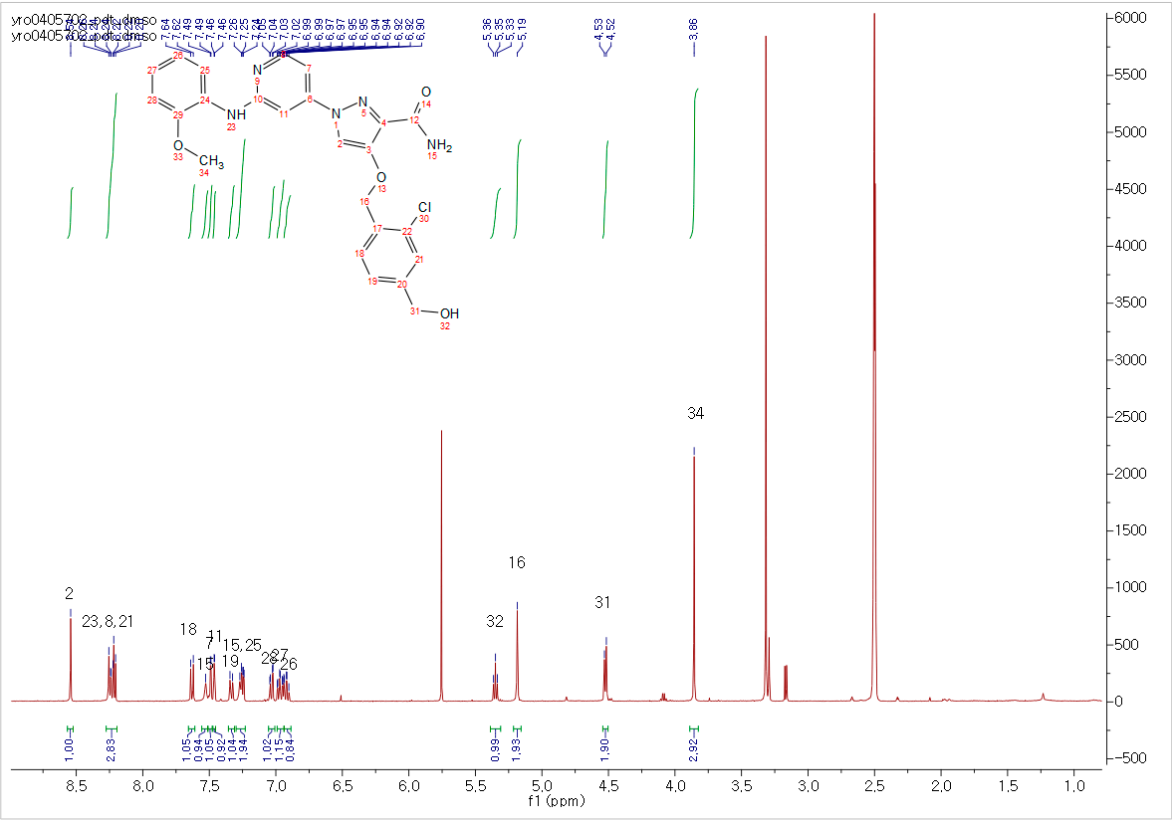

18

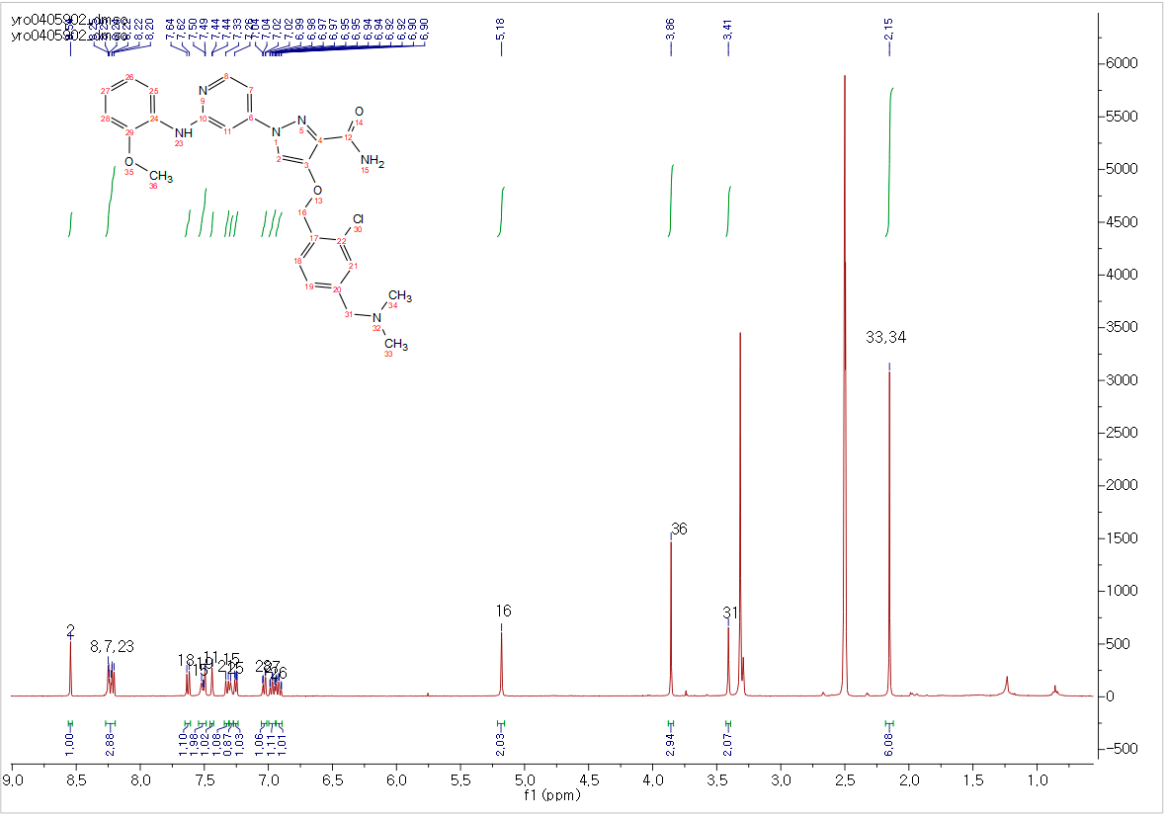



## S5. Representative $^{13}\text{C}$ NMR spectrum

8a

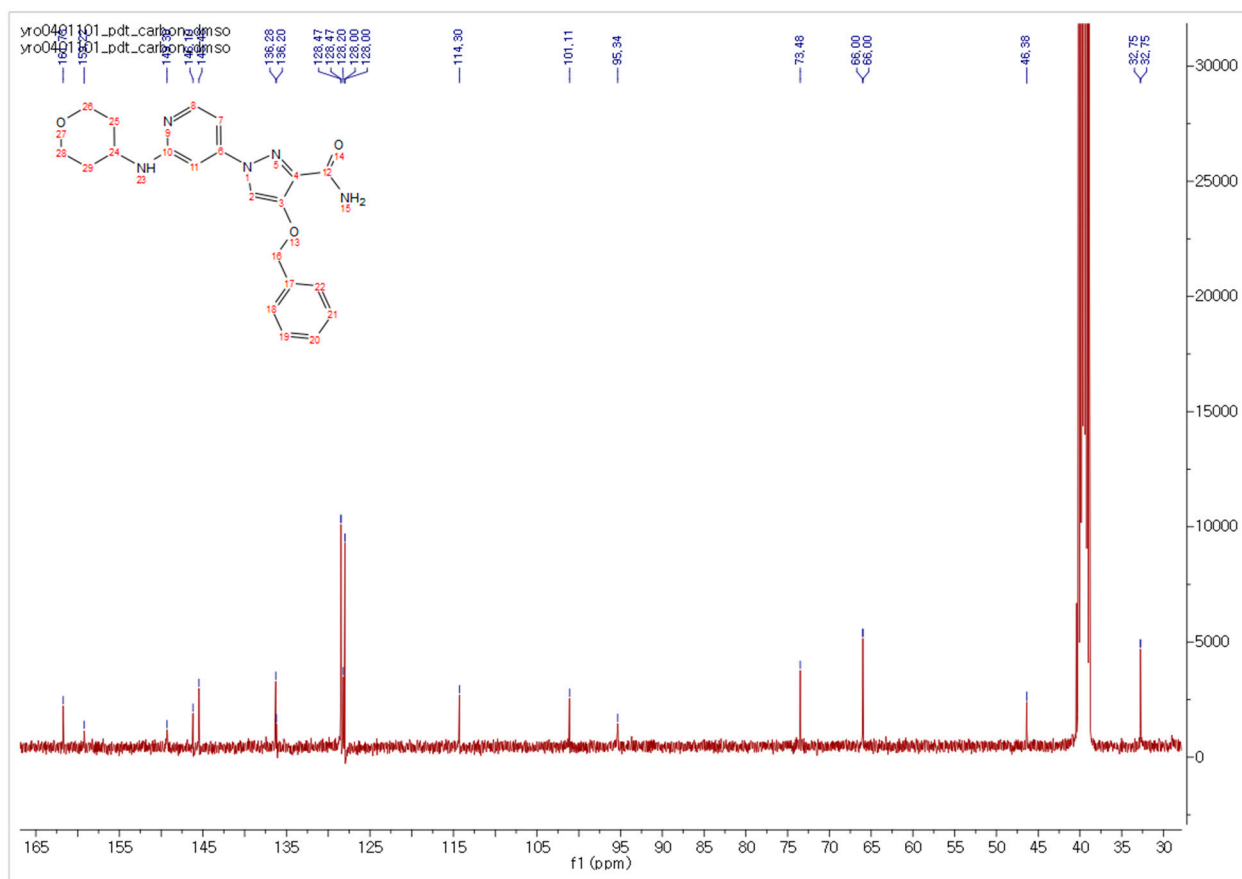

14a

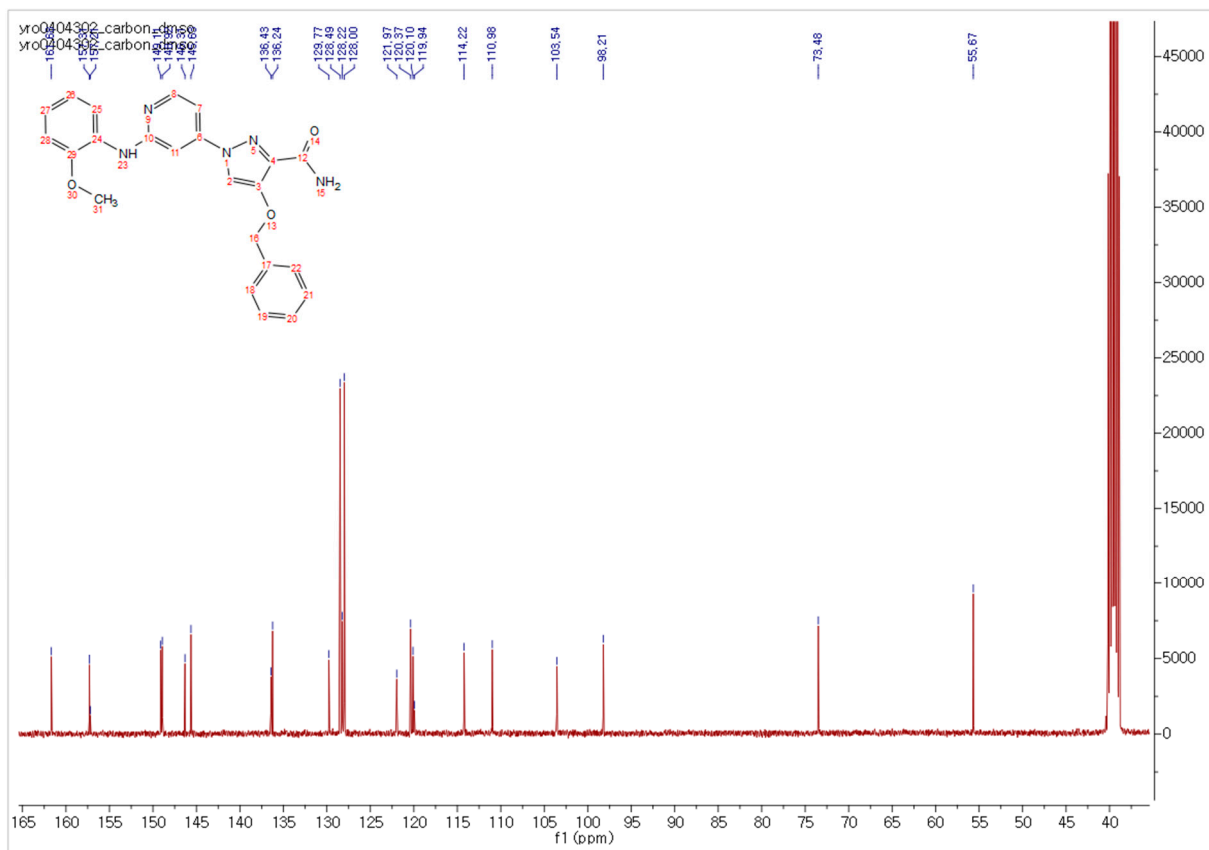

15

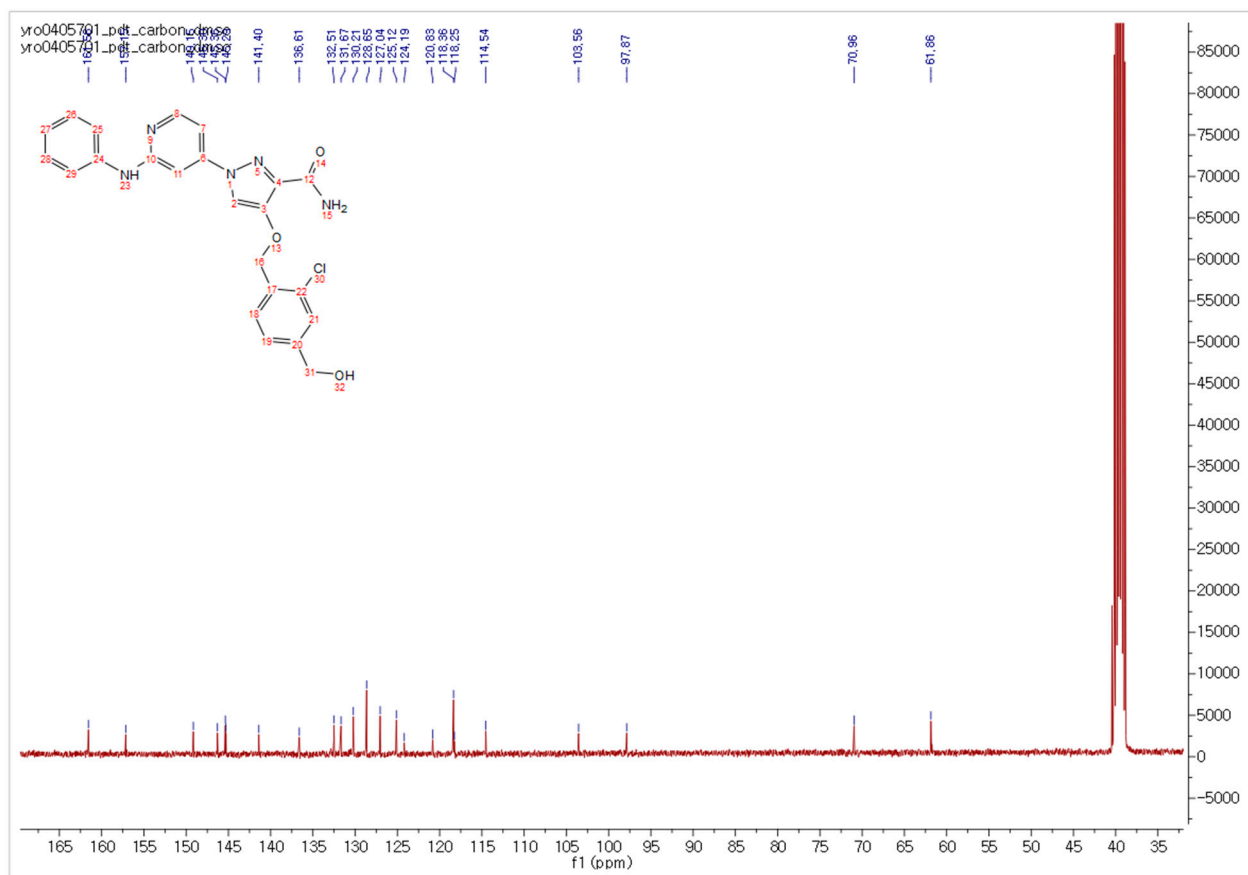

Supplement: s1 [file s1]
